# Supplementary material for: The facile activation of graphite for the improved determination of dopamine, rutin and acetamidophenol
Source: Royal Society of Chemistry journal article supplement (doi:10.1039/d2an02074b), 2023-01-01
Supplement: d2an02074b1.pdf [file d2an02074b1.pdf]

## Supporting Information

### **The facile activation of graphite for the improved determination of dopamine, acetamidophenol and rutin**

Yanxue Xu<sup>a</sup>, Guihua Chen<sup>b</sup>, Yunting Qin<sup>b</sup> and Dan Xiao<sup>a,c\*</sup>

<sup>a</sup>*Institute of Advanced Study, Chengdu University, No. 2025, Chengluo Avenue, Chengdu, P. R. China*

<sup>b</sup>*Sichuan Industrial Institute of Antibiotics, Chengdu University, No. 2025, Chengluo Avenue, Chengdu, P. R. China*

<sup>c</sup>*College of Chemical Engineering, Sichuan University, No. 29 Wangjiang Road, Chengdu, P. R. China*

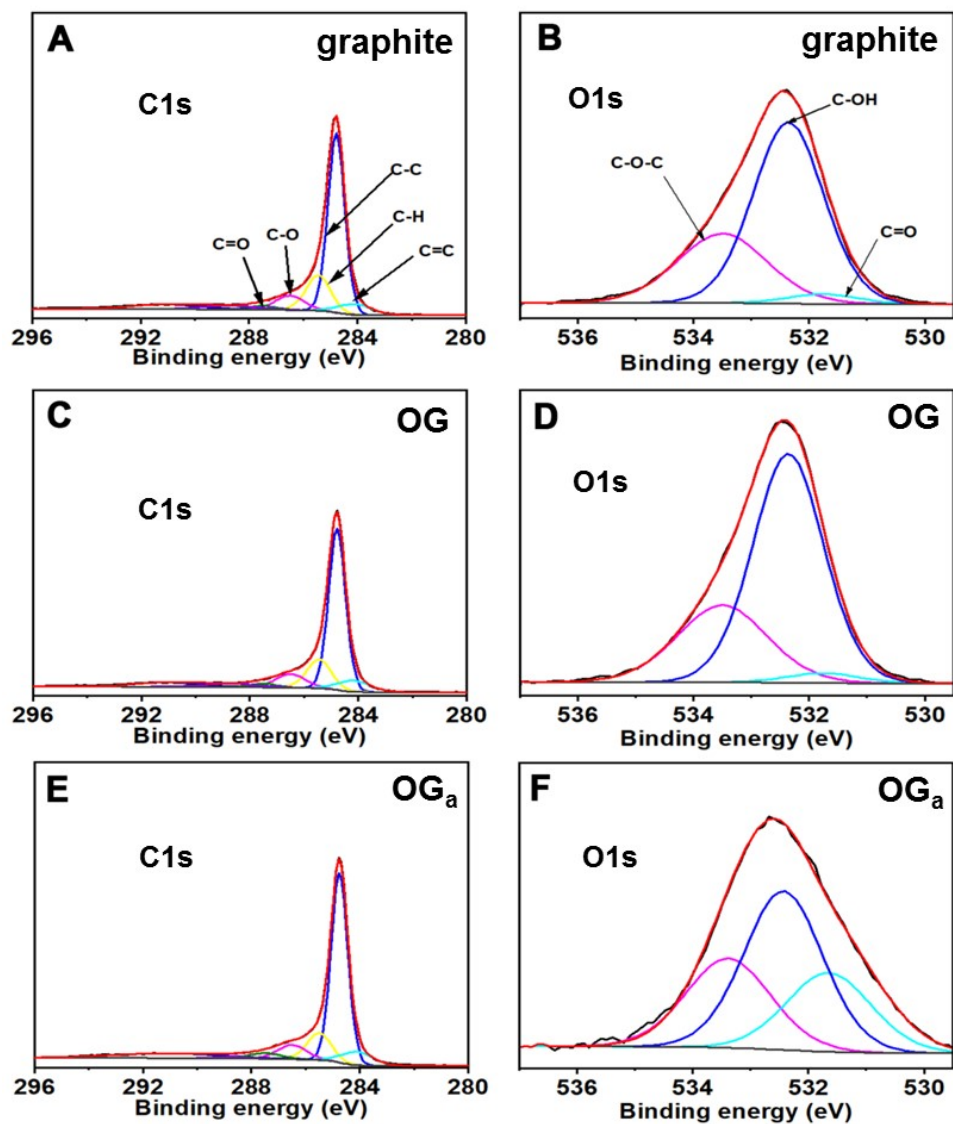

**Figure S1** XPS spectrum: (A-B) the C 1s and O 1s core peaks of graphite; (C-D) the C 1s and O 1s core peaks of OG; (E-F) the C 1s and O 1s core peaks of OG<sub>a</sub>. OG<sub>a</sub> was OG being cycled in PBS (pH 6.0) containing the analytes of DA, RT and APAP with 100 cycles. The concentration of the analytes was 200  $\mu$ M.

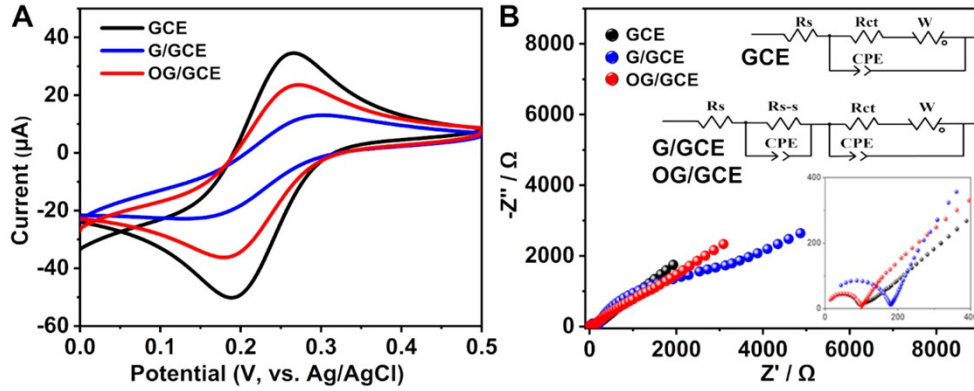

**Figure S2** (A) CV curves of bare GCE, G/GCE, OG/GCE in 0.1 M KCl with 1.0 mM  $[\text{Fe}(\text{CN})_6]^{3-/4-}$  at 50 mV/s; (B) EIS of bare GCE, G/GCE, OG/GCE at a constant potential of 0.25 V in 0.1 M KCl with 1.0 mM  $[\text{Fe}(\text{CN})_6]^{3-/4-}$  and the corresponding equivalent circuit diagrams.

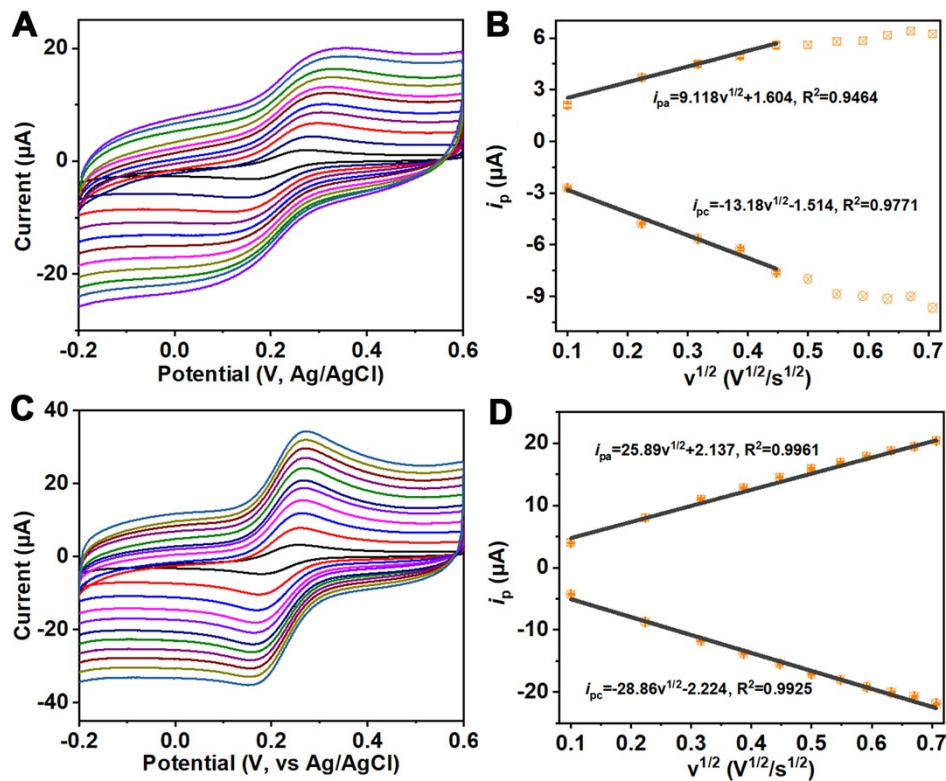

**Figure S3** Cyclic voltammograms and the corresponding linear plots of  $i_p$  versus  $v^{1/2}$  of G/GCE (A, B) and OG/GCE (C, D) at different scan rates: 10, 50, 100, 150, 200, 250, 300, 350, 400, 450, 500 mV/s in 1.0 mM  $\text{K}_3\text{Fe}(\text{CN})_6$  containing 0.1 M KCl.

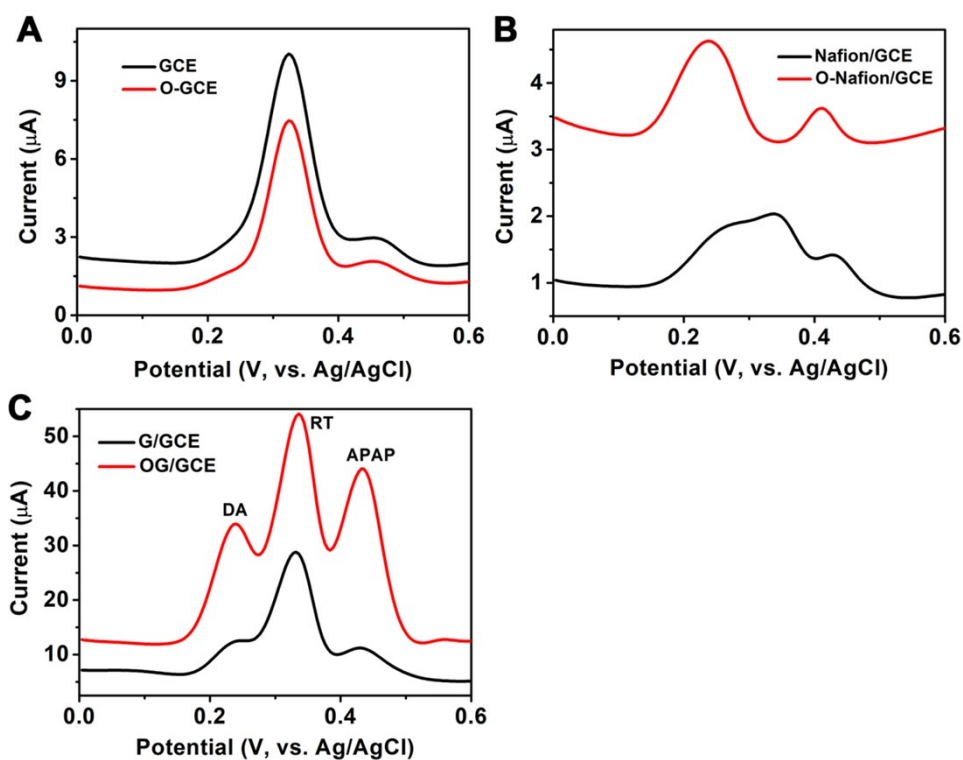

**Figure S4** DPV curves of different electrodes before (black curve) and after (red curve) being immersed in sodium peroxide solution for 2 min: (A) bare GCE, (B) Nafion/GCE, (C) G/GCE. The medium is PBS (pH 6.0) with 10  $\mu\text{M}$  DA, 4.0  $\mu\text{M}$  RT and 50  $\mu\text{M}$  APAP.

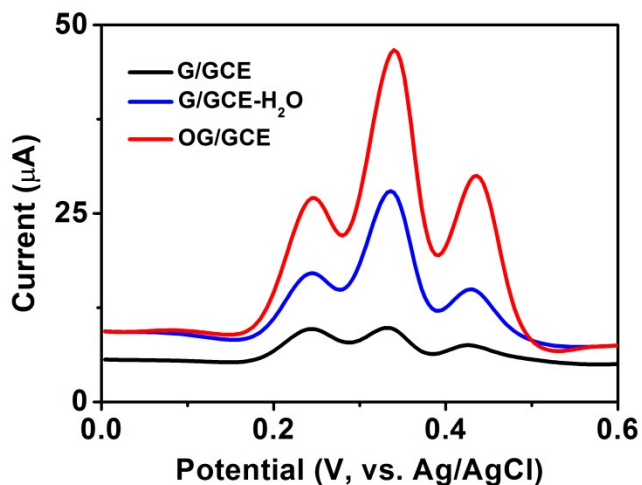

**Figure S5** DPV curves of G/GCE (black curve), G/GCE immersed in water for 2 min (G/GCE-H<sub>2</sub>O, blue curve) and OG/GCE (red curve) immersed in sodium peroxide solution for 2 min toward 10 μM DA, 1.0 μM RT and 30 μM APAP.

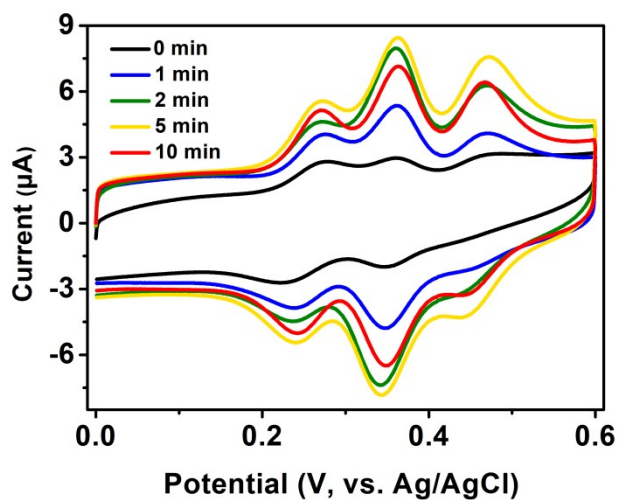

**Figure S6** CV curves of OG/GCE immersed in Na<sub>2</sub>O<sub>2</sub> solution for different time responding to DA, RT and APAP.

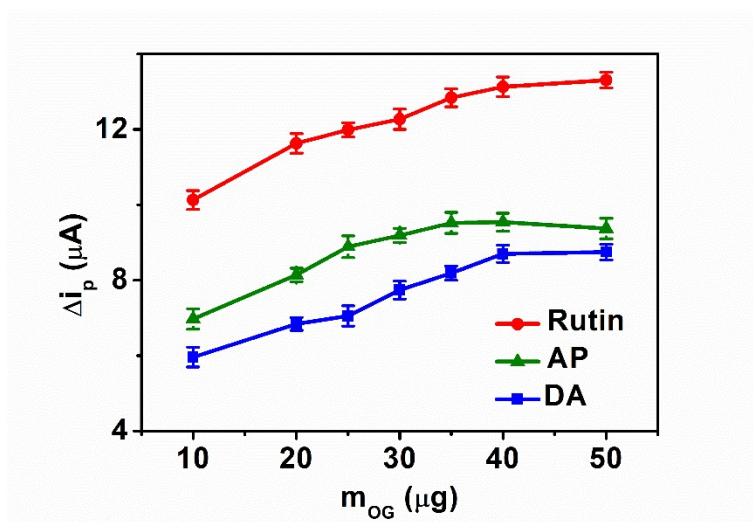

**Figure S7** OG/GCE modified with different mass of graphite toward DA, RT and APAP . Error bar was calculated by three replicates.

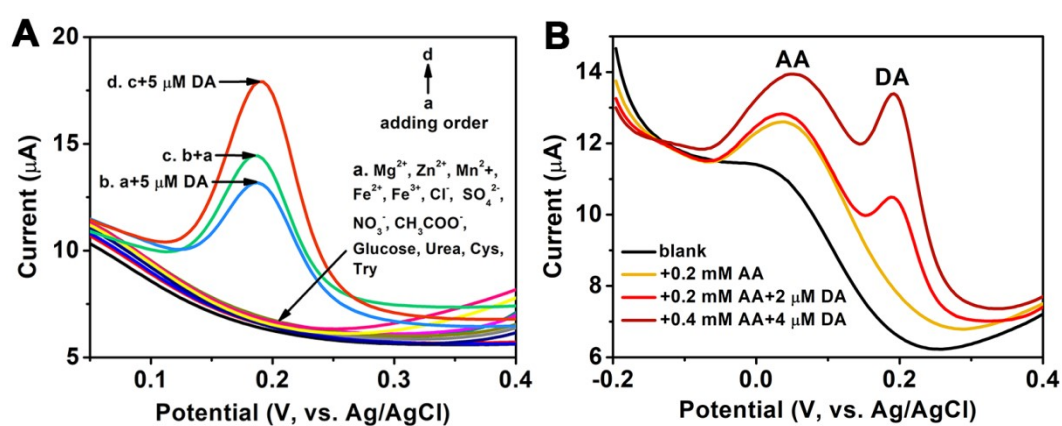

**Figure S8** (A) Selectivity of OG/GCE towards DA against with the coexisting interferents, the adding order is: a. interferents (1 mM); b. first addition of 5  $\mu\text{M}$  DA; c. second addition of the interferents (1 mM); d. second addition of 5  $\mu\text{M}$  DA. (B) Interference studies of OG/GCE towards DA against with high concentration of ascorbic acid (AA).

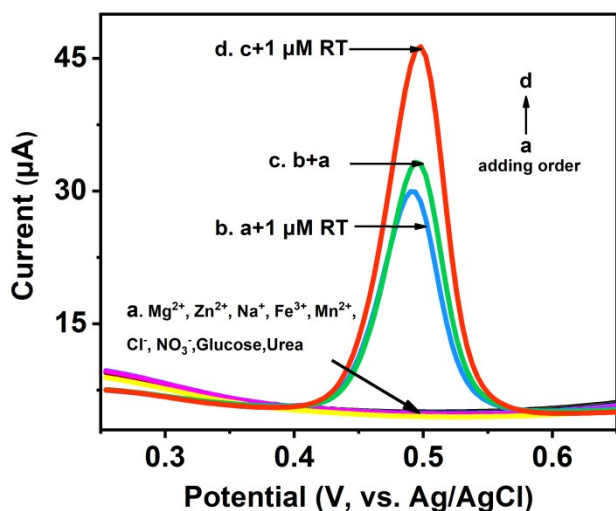

**Figure S9** Selectivity of OG/GCE towards RT against with the coexisting interferents, the adding order is: a. interferents (1 mM); b. first addition of 1.0  $\mu\text{M}$  RT; c. second addition of the interferents (1 mM); d. second addition of 1.0  $\mu\text{M}$  RT.

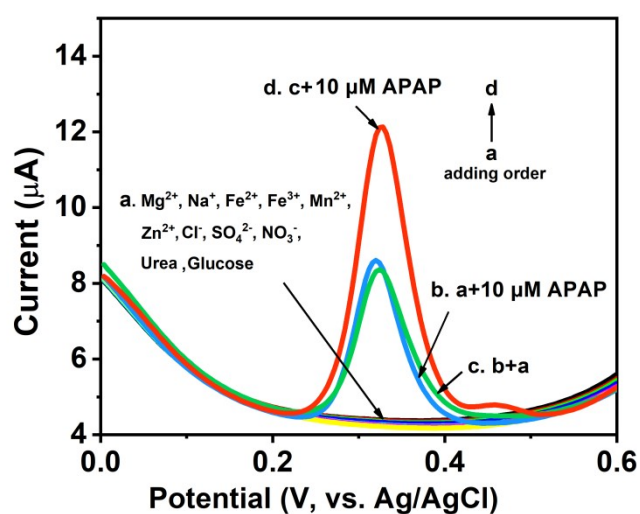

**Figure S10** Selectivity of OG/GCE towards APAP against with the coexisting interferents, the adding order is: a. interferents (1 mM); b. first addition of 10  $\mu\text{M}$  APAP; c. second addition of the interferents (1 mM); d. second addition of 10  $\mu\text{M}$  APAP.

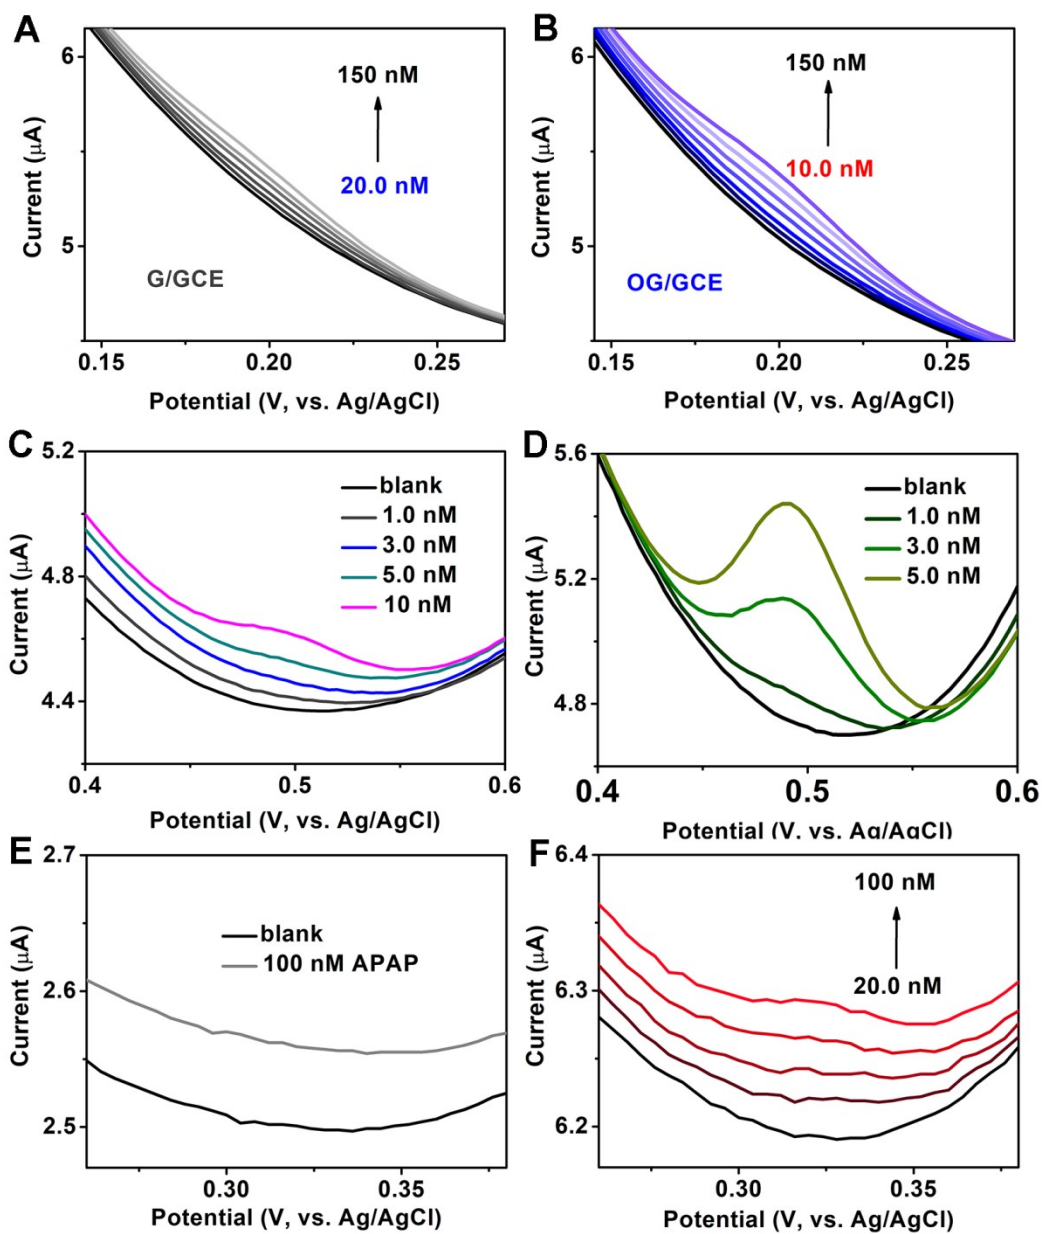

**Figure S11** DPV curves about the detection limits of G/GCE (left) and OG/GCE (right) toward DA (A-B), RT (C-D) and APAP (E-F).



**Table S1.** OG/GCE compared with the reported sensors for the detection of DA, RT and APAP.

| Electrodes                                      | Methods | Linear range         |                      |                        | LOD ( $\mu\text{M}$ )      | Ref.      |
|-------------------------------------------------|---------|----------------------|----------------------|------------------------|----------------------------|-----------|
|                                                 |         | RT ( $\mu\text{M}$ ) | DA ( $\mu\text{M}$ ) | APAP ( $\mu\text{M}$ ) |                            |           |
| MXene-FeWO <sub>4</sub> /GCE                    | SWV     | 0.001-0.147          | --                   | --                     | 0.00042                    | 1         |
| MIP/AuNPs-MoS <sub>2</sub> -GN/GCE <sup>a</sup> | DPV     | 0.01-45.0            | --                   | --                     | 0.004                      | 2         |
| Mg-Al-Si@PC/GCE <sup>b</sup>                    | DPV     | 1-10                 | --                   | --                     | 0.01                       | 3         |
| ICBG/SPCE <sup>c</sup>                          | DPV     | 0.08-52              | --                   | --                     | 0.011                      | 4         |
| Nafion-GO-IL/CILE <sup>d</sup>                  | DPV     | 0.08-100             | --                   | --                     | 0.016                      | 5         |
| PEDOT-MC/AgNPs/GCE <sup>e</sup>                 | DPV     | 0.005-0.5            | --                   | --                     | 0.0035                     | 6         |
| Ru-(L-Ala)-C <sub>3</sub> N <sub>4</sub> /GCE   | DPV     | --                   | 0.06-490             | --                     | 0.02                       | 7         |
| NC/MWCNT/GCE <sup>f</sup>                       | DPV     | --                   | 1-200                | --                     | 0.6                        | 8         |
| AgPd@Zr-MOF/GCE                                 | SWV     | --                   | 2-42                 | --                     | 0.1                        | 9         |
| AuNPs/N-doped CN/SPE <sup>g</sup>               | DPV     | --                   | 0.02-700             | --                     | 0.007                      | 10        |
| Ag/CuO/ITO                                      | CV      | --                   | 0.04-10              | --                     | 0.007                      | 11        |
| Fe/Fe <sub>3</sub> N@carbon nanocomposite       | DPV     | --                   | 0.05-66.4            | 0.05-56.9              | 0.97/0.21                  | 12        |
| phosphorus-doped graphene/GCE                   | DPV     | --                   | --                   | 1.5-120                | 0.36                       | 13        |
| Fc-rGO/PMo <sub>12</sub> /GCE <sup>h</sup>      | DPV     | --                   | --                   | 1-1000                 | 0.013                      | 14        |
| Pd-MWCNTs/GCE                                   | DPV     | --                   | --                   | 0.5-100                | 0.13                       | 15        |
| Ni/C-400/GCE <sup>i</sup>                       | DPV     | --                   | --                   | 0.20-53.75             | 0.0404                     | 16        |
| Pt/NGr/GCE <sup>j</sup>                         | SWV     | --                   | --                   | 0.05-90                | 0.008                      | 17        |
| OG/GCE                                          | DPV     | 0.010-10             | 0.001-0.15           | 0.020-30               | 0.0062<br>0.00036<br>0.013 | This Work |

a. molecularly imprinted polymer/ Au nanoparticles-MoS<sub>2</sub>-graphene

b. porous carbon encapsulated Mg-Al-Si alloy

c. indium-doped copper bismuthate/graphene

d. Nafion/graphene oxide/ionic liquid/ carbon ionic liquid electrode

e. poly(3,4-ethylene-dioxythiophene)/mesoporous carbon/Ag nanoparticles

f. nickel cobaltite/multi-walled carbon nanotube

g. Au nanoparticles/N-doped carbon nanorods

h. ferrocene based reduced graphene oxide/PMo<sub>12</sub>

i. nickel-doping nanoporous carbon

j. platinum nitrogen-doped graphene nanocomposite

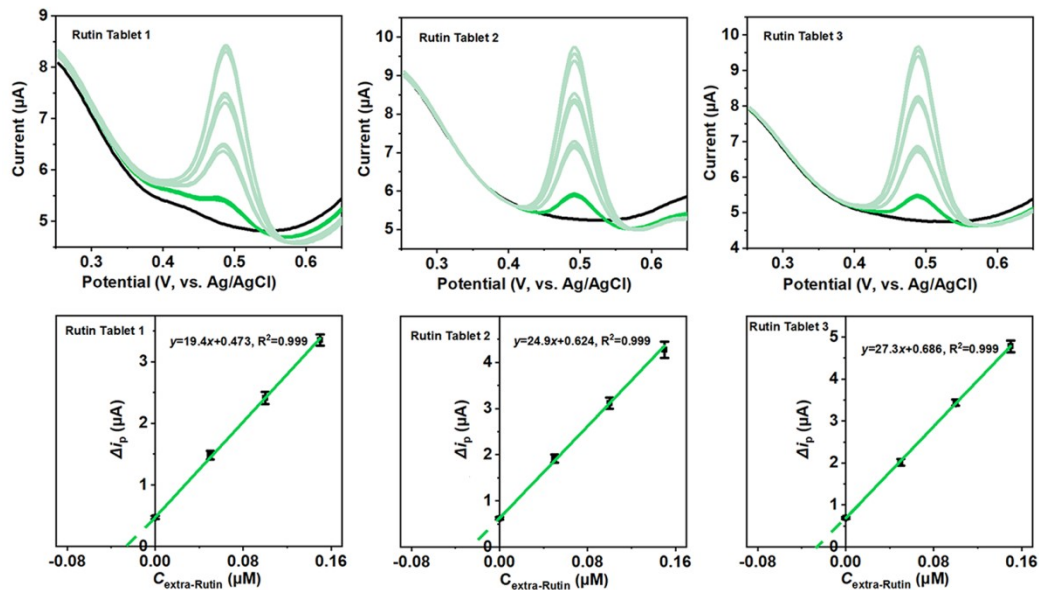

**Figure S12** Determination of RT in three rutin tablets: DPV curves and the corresponding linear fitting plots of  $\Delta i_p$ - $C_{RT}$ . The labelled content of RT is 20 mg/tablet.

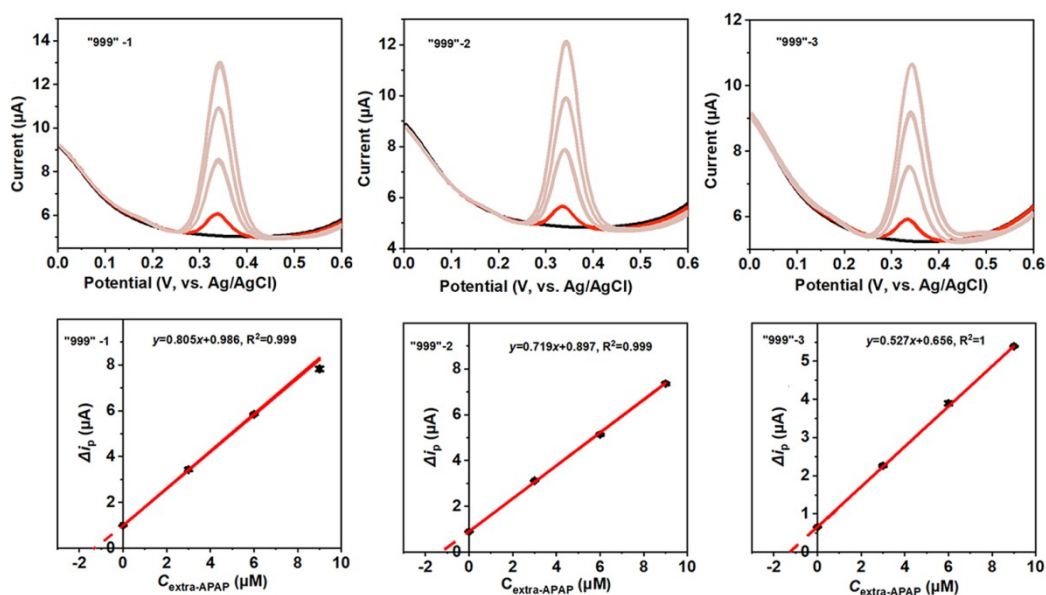

**Figure S13** Determination of APAP in three bags of 999 Ganmaoling granules: DPV curves and the corresponding linear fitting plots of  $\Delta i_p$ - $C_{APAP}$ . The labelled content of APAP is 200 mg/10 g.

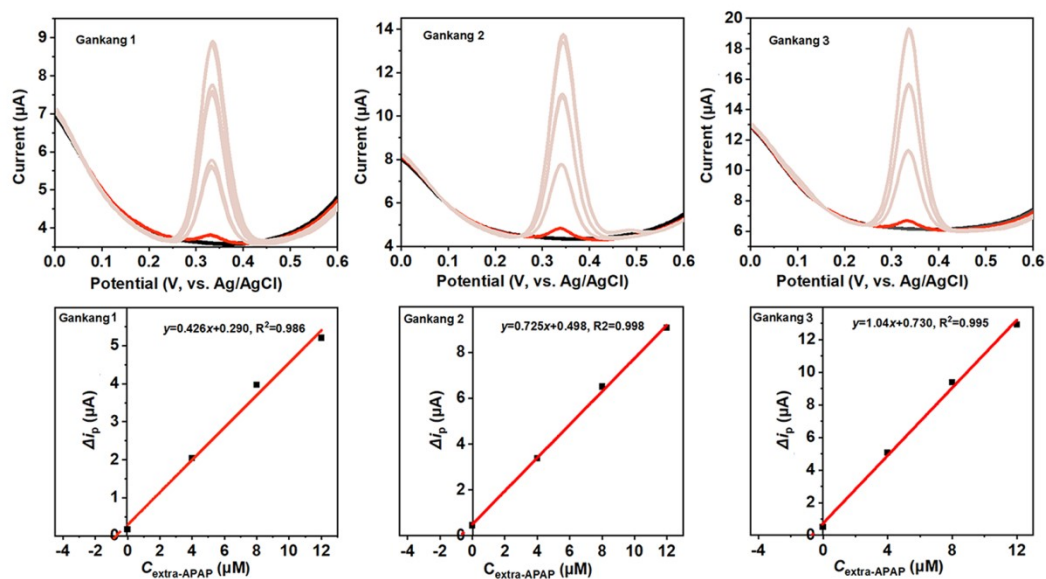

**Figure S14** Determination of APAP in three Gankang tablets: DPV curves and the corresponding linear fitting plots of  $\Delta i_p$ - $C_{APAP}$ . The labelled content of APAP is 250 mg/tablet.

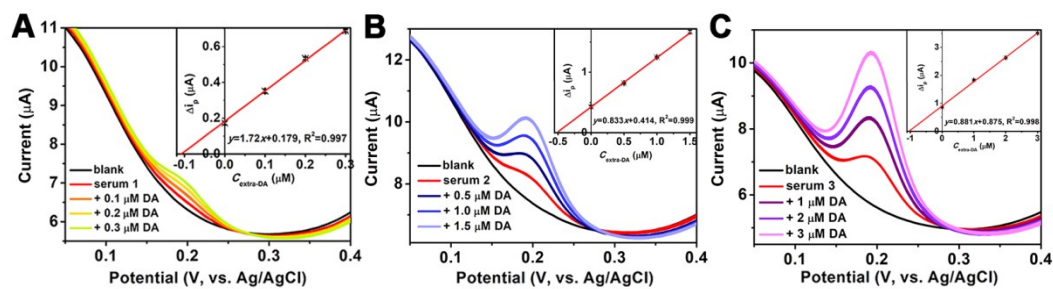

**Figure S15** Recovery experiments of DA in serums from 3 people: (A-C) DPV curves and the corresponding linear fitting plots. The working electrode was OG/GCE.

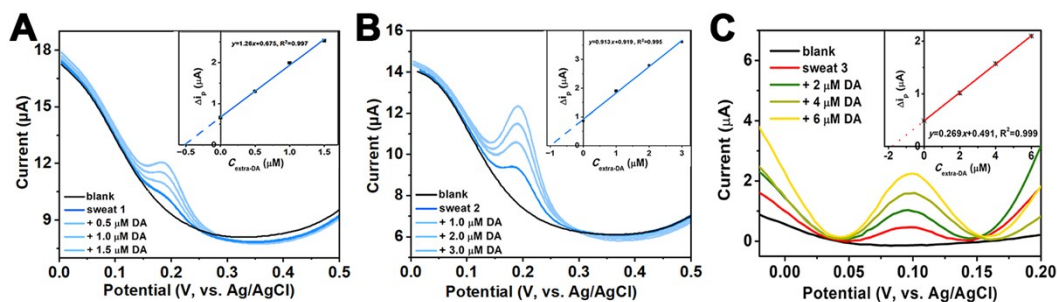

**Figure S16** Recovery experiments of DA in sweats from 3 people: (A-C) DPV curves and the corresponding linear fitting plots. Sweat 1 and sweat 2 were detected by

OG/GCE, sweat 3 was detected by OG/SPCE.

## Reference

1. Ranjith K. S., Vilian A. T. E., Ghoreishian S. M., Umapathi R., Huh Y. S., Han Y. K., *Sensor Actuat. B Chem.*, 2021, **344**, 130202.
2. Wang Y., Zhang B., Tang Y., Zhao F., Zeng B., *Microchem. J.*, 2021, **168**, 106505.
3. Yalikun N., Mamat X., Li Y., Hu X., Wang P., Hu G., *Microchim. Acta*, 2019, **186**, 379.
4. Kaleeswarran P., Koventhan C., Chen S.-M., Arumugam A., *Colloid. Surface. A*, 2022, **643**, 128740.
5. Hu S., Zhu H., Liu S., Xiang J., Sun W., Zhang L., *Microchim. Acta*, 2012, **178**, 211-219.
6. Zhang B., Jaouhari A. E., Wu X., Liu W., Zhu J., Liu X., *J. Electroanal. Chem.*, 2020, **877**, 114632.
7. Xie X., Wang D. P., Guo C., Liu Y., Rao Q., Lou F., Li Q., Dong Y., Li Q., Yang H. B., Hu F. X., *Anal. Chem.*, 2021, **93**, 4916-4923.
8. Poolakkandy R. R., Neelakandan A. R., Puthiyaparambath M. F., Krishnamurthy R. G., Chatanathodi R., Menamparambath M. M., *J. Mater. Chem. C*, 2022, **10**, 3048-3060.
9. Hira S. A., Nagappan S., Annas D., Kumar Y. A., Park K. H., *Electrochem. Commun.*, 2021, **125**, 107012.

10. Shi Z., Wu X., Zou Z., Yu L., Hu F., Li Y., Guo C., Li C. M., *Biosens. Bioelectron.*, 2021, **186**, 113303.
11. Li Y. Y., Kang P., Wang S. Q., Liu Z. G., Li Y. X., Guo Z., *Sensor Actuat. B Chem.*, 2021, **327**, 128878.
12. Cai X. Q., Huang Y., Luo Y. H., Liu Y., Zhang Q. Y., Zhao Z. A., Zhu Q., Chen F. Y., Zhang D. E., *Solid State Sci.*, 2022, **132**, 106984.
13. Zhang X., Wang K. P., Zhang L. N., Zhang Y. C., Shen L., *Anal. Chim. Acta*, 2018, **1036**, 26-32.
14. Han H., Liu C., Sha J., Wang Y., Dong C., Li M., Jiao T., *Talanta*, 2021, **235**, 122751.
15. Wu Y., Wu Y., Lv X., Lei W., Ding Y., Chen C., Lv J., Feng S., Chen S.-M., Hao Q., *Mater. Chem. Phys.*, 2020, **239**, 121977.
16. Guo L., Hao L., Zhang Y., Yang X., Wang Q., Wang Z., Wang C., *Talanta*, 2021, **228**, 122228.
17. Anuar N. S., Basirun W. J., Ladan M., Shalauddin M., Mehmood M. S., *Sensor Actuat. B Chem.*, 2018, **266**, 375-383.
